# Supplementary material for: Orthogonalization of spontaneous and stimulus-driven activity by hierarchical neocortical areal network in primates
Source: PubMed Central journal article supplement — Nat Commun. 2024 Dec 4;15:10055. doi: 10.1038/s41467-024-54322-x (PMC11618767; doi:10.1038/s41467-024-54322-x), 2024-12-04
Supplement: 41467_2024_54322_MOESM2_ESM.pdf [file 41467_2024_54322_MOESM2_ESM.pdf]

## Description of Additional Supplementary Files

**File name: Supplementary Movie 1**

**Description: Spontaneous cortical activity in occipital and parietal areas.** A movie of spontaneous cortical activity in FOV shown in **Fig. 1b-d**. Note that no high-pass filtering is used.

**File name: Supplementary Movie 2**

**Description: Spontaneous cortical activity in V1 and V2.** A movie of spontaneous cortical activity in FOV shown in **Supplementary Fig. 2d-f**. Note that no high-pass filtering is used. Note that no high-pass filtering is used.

**File name: Supplementary Movie 3**

**Description: Spontaneous cortical activity in temporal areas.** A movie of spontaneous cortical activity in FOV shown in **Fig. 1e-g**. Note that no high-pass filtering is used. Note that no high-pass filtering is used.

**File name: Supplementary Movie 4**

**Description: Another example of spontaneous cortical activity in occipital and parietal areas.** Movie of spontaneous cortical activity (not filtered) in FOV shown in **Supplementary Fig. 1b-d**. Note that GCaMP6f was used in this example.
